# Supplementary material
Source: PubMed Central journal article supplement (PMC9521662)

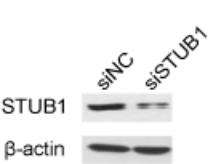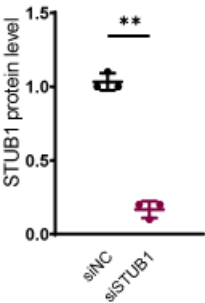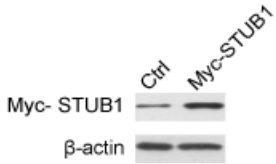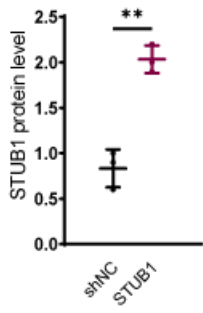

Supplement: uxac072_suppl_supplementary_figure_s1.pdf [file uxac072_suppl_supplementary_figure_s1.pdf]
